# Supplementary material for: Community Health Workers as Vaccinators: A Rapid Review of the Global Landscape, 2000–2021
Source: PubMed Central journal article supplement (PMC9972374; doi:10.9745/ghsp-d-22-00307), 2023-02-28
Supplement: GHSP-D-22-00307-Supplements.pdf [file GHSP-D-22-00307-Supplements.pdf]

**Supplement to:** Gibson E, Zameer M, Alban R, Kouwanou LM. Community health workers as vaccinators: a rapid review of the global landscape (2000-2021). *Glob Health Sci Pract.* 2023;11(1):e2200307.

<https://doi.org/10.9745/GHSP-D-22-00307>

## SUPPLEMENT 1. Database Search Terms for the Rapid Review of Community Health Workers as Vaccinators

| Database, Results<br><br>Filters                                                | Search Terms                                                                                                                                                                                                                                                                                                                                                                                                                                                                                                                                                                                                                                                                                                                                                                                                                                                                                                                                                                                                                                                                                                                                                                                                                                                                                                                                                                                                                                                                                                                                                                                                                                                                                                                                                                                                                                                                                                                                                                    |
|---------------------------------------------------------------------------------|---------------------------------------------------------------------------------------------------------------------------------------------------------------------------------------------------------------------------------------------------------------------------------------------------------------------------------------------------------------------------------------------------------------------------------------------------------------------------------------------------------------------------------------------------------------------------------------------------------------------------------------------------------------------------------------------------------------------------------------------------------------------------------------------------------------------------------------------------------------------------------------------------------------------------------------------------------------------------------------------------------------------------------------------------------------------------------------------------------------------------------------------------------------------------------------------------------------------------------------------------------------------------------------------------------------------------------------------------------------------------------------------------------------------------------------------------------------------------------------------------------------------------------------------------------------------------------------------------------------------------------------------------------------------------------------------------------------------------------------------------------------------------------------------------------------------------------------------------------------------------------------------------------------------------------------------------------------------------------|
| <p><b>PubMed,</b><br/>175</p> <p>Title/Abstract, filter by year (2000-2021)</p> | <p>((aides, community health[MeSH Terms]) OR (community health worker[MeSH Terms]) OR (community health workers[MeSH Terms]) OR (aides, community health[MeSH Terms]) OR (traditional birth attendant[MeSH Terms]) OR (traditional birth attendants[MeSH Terms]) OR (community health worker*[Title/Abstract]) OR (health extension worker*[Title/Abstract]) OR (health development army[Title/Abstract]) OR (agents de santé communautaire[Title/Abstract]) OR (agent de santé communautaire[Title/Abstract]) OR (Health surveillance Agent*[Title/Abstract]) OR (community health volunteer*[Title/Abstract]) OR (Family Welfare Assistant*[Title/Abstract]) OR (Health assistant*[Title/Abstract]) OR (Community health care provider*[Title/Abstract]) OR (community birth attendant*[Title/Abstract]) OR (Lady Health Worker*[Title/Abstract]) OR (Health Surveillance Assistant*[Title/Abstract]) OR (Anganwadi Worker*[Title/Abstract]) OR (Accredited Social Health Activist*[Title/Abstract]) OR (Accompagnateur*[Title/Abstract])OR (Shasthya Shebika*[Title/Abstract]) OR (Health Assistant*[Title/Abstract]) OR (Community-Based Skilled Birth Attendant*[Title/Abstract]) OR (Community Health Agent*[Title/Abstract]) OR (Community Health Assistant*[Title/Abstract]) OR (Community Based Agent*[Title/Abstract]) OR (Village Health Worker*[Title/Abstract]) OR (Village Health Team*[Title/Abstract]) OR (Home Based Carer*[Title/Abstract]) OR (Female Community Health Volunteer*[Title/Abstract]) OR (Maternal Child Health Worker*[Title/Abstract]) OR (Behvarz*[Title/Abstract]) OR (Brigadista*[Title/Abstract]) OR (Volunteer Midwives*[Title/Abstract]) OR (Volunteer Collaboration*[Title/Abstract]) OR (Health Promoter*[Title/Abstract]) OR (Agentes Polivalent* Elementar*[Title/Abstract])) AND ((administ*[Title/Abstract]) OR (deliver*[Title/Abstract]) OR (inject*[Title/Abstract]) OR (give*[Title/Abstract]) OR (gave[Title/Abstract]))</p> |
| <p><b>Cochrane Library (Reviews and Trials),</b><br/>3 reviews, 111 trials</p>  | <p>(“community health worker” OR “community health aid” OR “traditional birth attendant” OR “health extension worker” OR “health surveillance agent” OR “community health volunteer” OR “family welfare assistant” OR “health assistant” OR “community health care</p>                                                                                                                                                                                                                                                                                                                                                                                                                                                                                                                                                                                                                                                                                                                                                                                                                                                                                                                                                                                                                                                                                                                                                                                                                                                                                                                                                                                                                                                                                                                                                                                                                                                                                                          |

**Supplement to:** Gibson E, Zameer M, Alban R, Kouwanou LM. Community health workers as vaccinators: a rapid review of the global landscape (2000-2021). *Glob Health Sci Pract.* 2023;11(1):e2200307.

<https://doi.org/10.9745/GHSP-D-22-00307>

| Database, Results<br><br>Filters                                         | Search Terms                                                                                                                                                                                                                                                                                                                                                                                                                                                                                                                                                                                                                                                                                                                                                                                                                                                                                                                                                                                                                                                                    |
|--------------------------------------------------------------------------|---------------------------------------------------------------------------------------------------------------------------------------------------------------------------------------------------------------------------------------------------------------------------------------------------------------------------------------------------------------------------------------------------------------------------------------------------------------------------------------------------------------------------------------------------------------------------------------------------------------------------------------------------------------------------------------------------------------------------------------------------------------------------------------------------------------------------------------------------------------------------------------------------------------------------------------------------------------------------------------------------------------------------------------------------------------------------------|
| Title/Abstract/Keyword (default), restricted to 01/01/2000 to 30/07/2021 | provider” OR “community birth attendant” OR “lady health worker attendant” OR “health extension worker” OR “health surveillance agent” OR “co” OR “health surveillance assistant” OR “Anganwadi Worker” OR “Accredited Social Health Activist” OR “Accompagnateur” OR “Shasthya Shebika” OR “Health Assistant” OR “Community-Based Skilled Birth Attendant” OR “Community Health Agent” OR “Community Health Assistant” OR “Community Based Agent” OR “Village Health Worker” OR “Village Health Team” OR “Home Based Carer” OR “Female Community Health Volunteer” OR “Maternal Child Health Worker” OR “Behvarz” OR “Brigadista” OR “Volunteer Midwives” OR “Volunteer Collaboration” OR “Health Promoter” OR “Agentes Polivalentes Elementares”):ti,ab,kw AND (vaccination OR immunization):ti,ab,kw AND (administer OR deliver OR inject OR give OR gave):ti,ab,kw" (Word variations have been searched)                                                                                                                                                                    |
| WebOfScience: 143<br><br>Abstract, 2000-2021                             | ((AB=("community health worker*" OR "community health aid*" OR "traditional birth attendant*" OR "health extension worker*" OR "health surveillance agent*" OR "community health volunteer*" OR "family welfare assistant*" OR "health assistant*" OR "community health care provider*" OR "community birth attendant*" OR "lady health worker*" OR "health surveillance assistant*" OR "Anganwadi Worker*" OR "Accredited Social Health Activist*" OR "Accompagnateur*" OR "Shasthya Shebika*" OR "Health Assistant*" OR "Community-Based Skilled Birth Attendant*" OR "Community Health Agent*" OR "Community Health Assistant*" OR "Community Based Agent*" OR "Village Health Worker*" OR "Village Health Team*" OR "Home Based Carer*" OR "Female Community Health Volunteer*" OR "Maternal Child Health Worker*" OR "Behvarz*" OR "Brigadista*" OR "Volunteer Midwives*" OR "Volunteer Collaboration*" OR "Health Promoter*" OR "Agentes Polivalent* Elementar*")) AND AB=(vaccin* OR immuniz* OR immunis*)) AND AB=(administer* OR deliver* OR inject* OR give* OR gave) |

**Supplement to:** Gibson E, Zameer M, Alban R, Kouwanou LM. Community health workers as vaccinators: a rapid review of the global landscape (2000-2021). *Glob Health Sci Pract.* 2023;11(1):e2200307. <https://doi.org/10.9745/GHSP-D-22-00307>

## SUPPLEMENT 2. Selected Documents for the Rapid Review of CHWs as Vaccinators

| Author(s)<br>Year                                                        | Article Type                              | Vaccinating CHW Cadres, Countries Identified                                                                                                                                                |
|--------------------------------------------------------------------------|-------------------------------------------|---------------------------------------------------------------------------------------------------------------------------------------------------------------------------------------------|
| Admassie, Abebaw, and Woldemichael <sup>38</sup><br>2009                 | Original research, impact evaluation      | Health Extension Worker (HEW), Ethiopia                                                                                                                                                     |
| Ahmed et al. <sup>39</sup><br>2021                                       | Report                                    | Community Health Volunteer (CHV), Kenya                                                                                                                                                     |
| Bilal et al. <sup>40</sup><br>2011                                       | Report                                    | Health Extension Worker (HEW), Ethiopia                                                                                                                                                     |
| Bisrat et al. <sup>41</sup><br>2019                                      | Original research, cross sectional survey | Health Extension Worker (HEW), Ethiopia                                                                                                                                                     |
| Chernoff and Cueva <sup>42</sup><br>2017                                 | Original research, qualitative methods    | Community Health Aids/Practitioners (CHA/Ps), United States                                                                                                                                 |
| Closser <sup>43</sup><br>2015                                            | Opinion                                   | Lady Health Worker (LHW), Pakistan                                                                                                                                                          |
| Gavi: The Vaccine Alliance <sup>44</sup><br>2018                         | Report                                    | Lady Health Worker (LHW), Pakistan                                                                                                                                                          |
| Glenton et al. <sup>45</sup><br>2013                                     | Review                                    | Village Health Volunteer, Papua New Guinea<br>Traditional Birth Attendant (TBA), Ghana<br>Traditional Birth Attendant (TBA), Mali                                                           |
| Gov. of the Republic of Malawi: Ministry of Health <sup>23</sup><br>2017 | Report                                    | Health Surveillance Assistant (HSA), Malawi                                                                                                                                                 |
| Hobble, Rosqueta, and McLaughlin <sup>46</sup><br>2018                   | Report                                    | Community Health Worker (CHW), Kenya                                                                                                                                                        |
| Hodgins <sup>47</sup><br>2021                                            | Report                                    | Health Assistant (HA), Bangladesh<br>Auxiliary Health Worker (AHW), Nepal<br>Health Extension Worker (HEW), Ethiopia<br>Community Health Extension Workers (CHEWs) or Junior CHEWs, Nigeria |
| Huang et al. <sup>48</sup><br>2018                                       | Review                                    | Village-based Health Worker, China                                                                                                                                                          |

**Supplement to:** Gibson E, Zameer M, Alban R, Kouwanou LM. Community health workers as vaccinators: a rapid review of the global landscape (2000-2021). *Glob Health Sci Pract.* 2023;11(1):e2200307.

<https://doi.org/10.9745/GHSP-D-22-00307>

| <b>Author(s)<br/>Year</b>                            | <b>Article Type</b>                                           | <b>Vaccinating CHW Cadres, Countries Identified</b>                                                                                                                                                                                                                                                                                                                    |
|------------------------------------------------------|---------------------------------------------------------------|------------------------------------------------------------------------------------------------------------------------------------------------------------------------------------------------------------------------------------------------------------------------------------------------------------------------------------------------------------------------|
| Kabambi and Abdallah <sup>49</sup><br>2020           | Editorial                                                     | Volunteer Vaccinators, Democratic Republic of Congo                                                                                                                                                                                                                                                                                                                    |
| Krishnaratne et al. <sup>50</sup><br>2021            | Original research, evaluation                                 | Health Extension Worker (HEW), Ethiopia                                                                                                                                                                                                                                                                                                                                |
| Levin et al. <sup>51</sup><br>2005                   | Original research, retrospective cost analysis                | Village-based Midwife, Indonesia<br>Traditional Birth Attendant, Afghanistan<br>Traditional Birth Attendant, Mali                                                                                                                                                                                                                                                      |
| Mavalankar and Vora <sup>52</sup><br>2008            | Report                                                        | Auxiliary Nurse Midwife (ANM), India                                                                                                                                                                                                                                                                                                                                   |
| Munthali <sup>53</sup><br>2016                       | Report                                                        | Health Surveillance Assistant (HSA), Malawi                                                                                                                                                                                                                                                                                                                            |
| Murakami et al. <sup>54</sup><br>2014                | Original research, mixed methods                              | Lady Health Worker (LHW), Pakistan                                                                                                                                                                                                                                                                                                                                     |
| Nath, Kaur, and Tripathi <sup>55</sup><br>2015       | Original research, site evaluation and cross-sectional survey | Auxiliary Nurse Midwife (ANM), India                                                                                                                                                                                                                                                                                                                                   |
| Ngwira, Hutchinson, and Mayhew <sup>56</sup><br>2021 | Original research, qualitative methods                        | Health Surveillance Assistant (HSA), Malawi                                                                                                                                                                                                                                                                                                                            |
| Nicks et al. <sup>57</sup><br>2021                   | Opinion                                                       | Health Surveillance Assistant (HSA), Malawi                                                                                                                                                                                                                                                                                                                            |
| Nyirenda and Flikke <sup>58</sup><br>2013            | Original research, qualitative methods                        | Health Surveillance Assistant (HSA), Malawi                                                                                                                                                                                                                                                                                                                            |
| Perry <sup>59</sup><br>2021                          | Report                                                        | Health Extension Worker (HEW), Ethiopia<br>Auxiliary Nurse Midwife (ANM), India<br>Health Assistant (HA), Bangladesh<br>Community Health Extension Worker (CHEW), Nigeria<br>Lady Health Worker (LHW), Pakistan<br>Health Surveillance Assistant (HSA), Malawi<br>Community Health Agent (CHA), Brazil<br>Behvarzs, Iran<br>Community Health Nurse (CHN) and Community |

**Supplement to:** Gibson E, Zameer M, Alban R, Kouwanou LM. Community health workers as vaccinators: a rapid review of the global landscape (2000-2021). *Glob Health Sci Pract.* 2023;11(1):e2200307.  
<https://doi.org/10.9745/GHSP-D-22-00307>

| <b>Author(s)<br/>Year</b>                                                           | <b>Article Type</b>                                                    | <b>Vaccinating CHW Cadres, Countries Identified</b>                                           |
|-------------------------------------------------------------------------------------|------------------------------------------------------------------------|-----------------------------------------------------------------------------------------------|
|                                                                                     |                                                                        | Health Officer (CHO), Ghana<br>Kader, Indonesia<br>Agents de Santé Communautaire (ASC), Niger |
| Prinja et al. <sup>60</sup><br>2014                                                 | Original research,<br>economic analysis                                | Auxiliary Nurse Midwife (ANM), India                                                          |
| Punjab University<br>Institute of<br>Communication<br>Studies <sup>21</sup><br>2011 | Evaluation                                                             | Lady Health Worker (LHW), Pakistan                                                            |
| Sebhatu <sup>61</sup><br>2008                                                       | Report                                                                 | Health Extension Worker (HEW), Ethiopia                                                       |
| Singh et al. <sup>62</sup><br>2018                                                  | Original research,<br>mixed methods time<br>and motion study           | Auxiliary Nurse Midwife (ANM), India                                                          |
| Singh et al. <sup>63</sup><br>2015                                                  | Original research,<br>case studies                                     | Behvarz, Iran                                                                                 |
| Thacker et al. <sup>64</sup><br>2013                                                | Original research,<br>cross sectional<br>survey                        | Auxiliary Nurse Midwife (ANM), India                                                          |
| Tsega et al. <sup>65</sup><br>2016                                                  | Original research,<br>cross sectional<br>descriptive cluster<br>survey | Health Surveillance Assistant (HSA), Malawi                                                   |
| USAID Maternal<br>and Child Survival<br>Program <sup>66</sup><br>2018               | Report                                                                 | Auxiliary Nurse Midwife (ANM), India                                                          |
| Wang et al. <sup>67</sup><br>2007                                                   | Program evaluation                                                     | Village-Based Health Worker, China                                                            |
